# Supplementary material for: Influence of Changes in the Level of Volatile Compounds Emitted during Rapeseed Quality Degradation on the Reaction of MOS Type Sensor-Array
Source: MDPI journal article supplement (doi:10.3390/s20113135), 2020-06-01
Supplement: s1 [file s1]

## Supplementary Materials

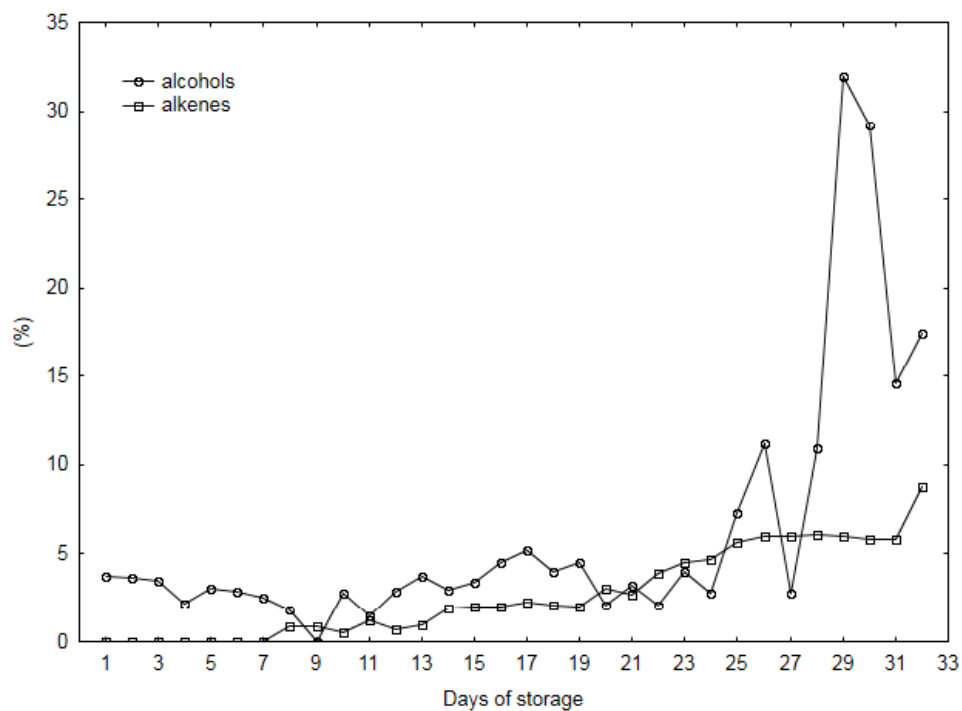

**Figure S1.** An alcohols and alkenes as the function of days storage.

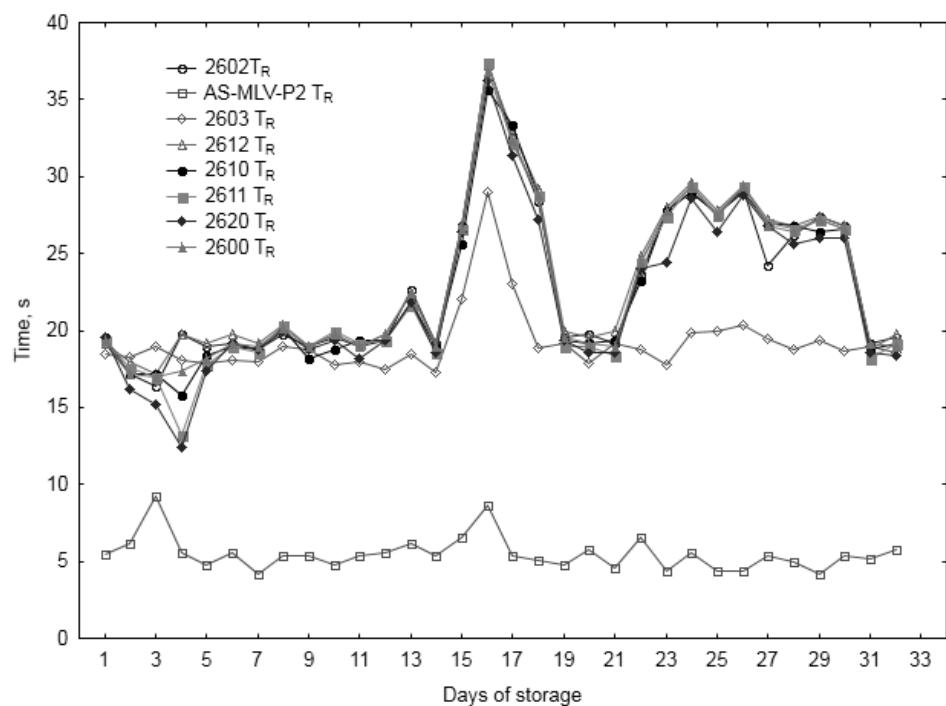

**Figure S2.** Time reaction of sensors -  $T_R$  as a function of time storage.

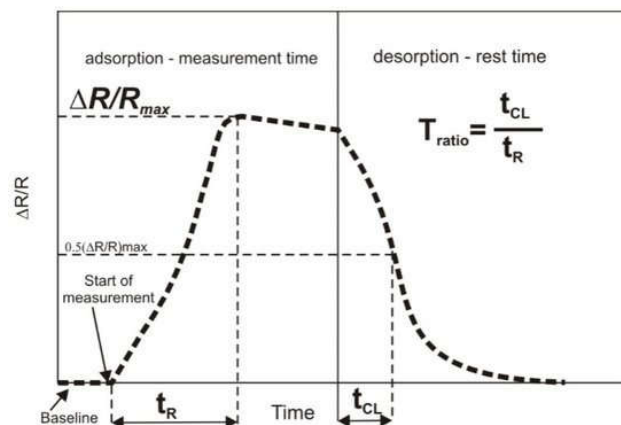

**Figure S3.** Scheme of a typical sensorgram with three-parameters for metal oxide semiconductor (MOS).

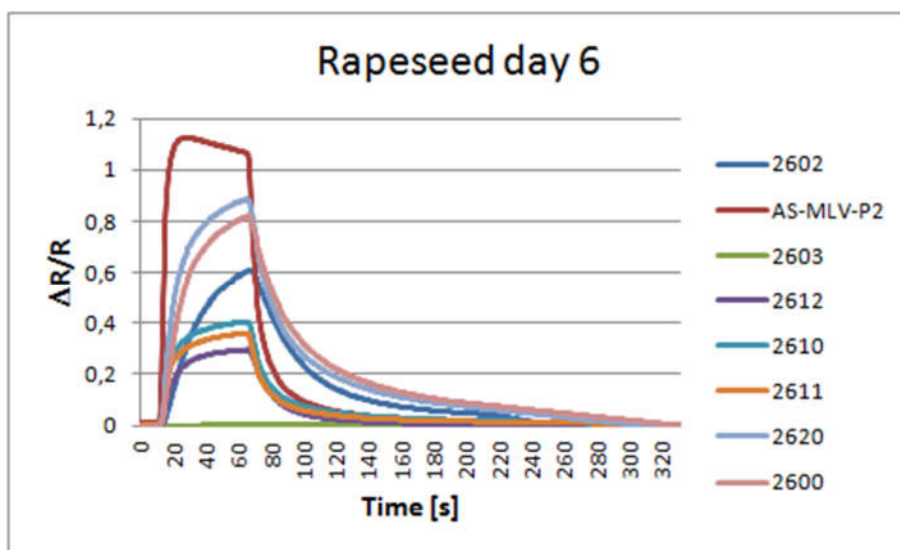

**Figure S4.** Typical response graph for metal oxide semiconductor (MOS).
